# Supplementary material
Source: Elsevier journal article supplement (https://www.sciencedirect.com/science/article/pii/S2173507714003366)
Supplement: mmc1 [file S2173507714003366:mmc1.doc]

**PROPUESTA DE POSICIONAMIENTO DE LAS SOCIEDADES SECO-SEEN-SEEDO-SED SOBRE LA CIRUGÍA METABÓLICA EN LA DIABETES MELLITUS TIPO-2**

*Miguel A. Rubio*, Susana Monero*, Albert Lecube*, Joaquin Resa**, Carlos Masdevall**, Felipe de la Cruz Vigo**, Mar Garrido#, Albert Goday#, Ignacio Llorente## y Carlos Pesquera##*

**Representante de la Sociedad Española de Endocrinología y Nutrición (SEN)*

***Representante de la Sociedad Española de Cirugía de la Obesidad y Enfemerdades Metabólicas (SECO)*

*#Representante de la sociedad Española para el Estudio de la Obesidad (SEEDO)*

*##Representante de la Sociedad Española de Diabetes (SED)*

**Definición**

La cirugía metabólica consiste en la aplicación de los procedimientos quirúrgicos encaminados al tratamiento de la diabetes mellitus tipo 2 (DM2) y de los factores de riesgo cardiometabólicos susceptibles de mejoría.

**Indicaciones**

1.- La cirugía metabólica está indicada en pacientes con obesidad (IMC ≥ 35 kg/m2), especialmente si la diabetes o sus comorbilidades son difíciles de controlar con cambios en el estilo de vida y tratamiento farmacológico (nivel de evidencia B).

2.- Aunque no recomendamos de manera indiscriminada la cirugía metabólica en DM2 con IMC 30-35 kg/m2, debido a insuficientes datos a largo plazo sobre reducción de morbi-mortalidad cardiovascular y/o disminución de complicaciones microvasculares (nivel de evidencia E), se puede plantear su aplicación en ciertas situaciones.

2.1.- Analizando la experiencia positiva de algunas series de casos y ensayos clínicos pequeños a corto y medio plazo en la mejoría del control glucémico y de las comorbilidades asociadas, consideramos que podrían ser candidatos a cirugía metabólica los pacientes con **DM2 e IMC 30-35 kg/m2** que cumplan los siguientes requisitos:

- Pacientes en los que, habiendo sido evaluados por un endocrinólogo en el contexto de un equipo interdisciplinar, se haya descartado otras formas de diabetes diferentes de la DM2 (diabetes tipo 1, LADA, MODY…)
- Que muestren un deterioro progresivo del control glucémico (**HbA1c > 7,5 %**) a pesar del tratamiento convencional optimizado y en los que, especialmente, coexistan otras comorbilidades mayores no controladas adecuadamente (dislipemia aterogénica, HTA, apneas obstructivas del sueño).

2.2.-La inclusión de pacientes fuera de estos criterios debe formar parte de protocolos de investigación bien diseñados y controlados, confrontados a tratamientos convencionales basados en cambios del estilo de vida y tratamiento farmacológico habitual.

3.-Conviene señalar que las tasas de remisión son menores cuando el diagnóstico de la diabetes supera los 10 años, el paciente sigue tratamiento con insulina y existe evidencia de escasa reserva pancreática.

**Criterios de remisión**

Se debe emplear el concepto de **remisión** y no el de curación en la evaluación de los resultados tras la cirugía metabólica.

En cualquier caso la cirugía debe contribuir en la totalidad de los casos a conseguir alcanzar las metas mínimas de buen grado control metabólico (con/sin tratamiento activo coadyuvante): HbA1c < 7 %, cLDL < 100 mg/dL, triglicéridos < 150 mg/dL, cHDL > 40 mg/dL (hombres) y > 50 mg/dL (mujeres), así como de PA < 140/80 mm Hg.

Los criterios de remisión de la DM2 propuestos en este posicionamiento son los mismos que los establecidos por consenso por un grupo de expertos endocrinólogos, cirujanos bariátricos, onco-hematólogos, y educadores en diabetes (Buse et al, 2009).

| ***Remisión parcial*** | HbA1c no diagnóstica de DM (< 6.5%).  Glucosa basal 100-125 mg/dl (5.6-6.9 mmol/l).  Ausencia de tratamiento farmacológico.  Al menos un año de duración. |
| --- | --- |
| ***Remisión completa*** | HbA1c “normal” (< 6%).  Glucosa basal < 100 mg/dl (< 5.6 mmol/l).  Ausencia de tratamiento farmacológico.  Al menos un año de duración. |
| ***Remisión prolongada*** | Al menos 5 años de remisión. |
| ***Mejoría***  HbA1c < 7 %, con tratamiento farmacológico | |
|  | |

**Técnicas quirúrgicas**

La cirugía metabólica debe ser realizada por un cirujano bariátrico experto (según criterios de competencia aceptados por SECO), cuya técnica quirúrgica comporte una mortalidad < 1 %, una morbilidad < 10 % y un índice de reintervenciones < 2 % anual.

La cirugía metabólica debe basarse en técnicas ya conocidas, pudiendo adaptarse a las nuevas condiciones de peso y control metabólico que necesite el paciente. Los procedimientos novedosos deben formar parte únicamente de ensayos clínicos estructurados.

La cirugía metabólica debe realizarse en el contexto de una colaboración interdisciplinar que agrupe, con los cirujanos bariátricos,a otros especialistas con los que compartir experiencias y resultados: endocrinólogos, cardiólogos, neumólogos, internistas, radiólogos, investigadores básicos y clínicos, etc.

**Consideraciones finales**

Las sociedades científicas firmantes del presente documento consideran la necesidad de valorar la incorporación progresiva y racional de la cirugía metabólica como un tratamiento alternativo eficaz en los algoritmos de tratamiento escalonado de la DM2.

**Bibliografía**

- American Diabetes Association. Standards of medical care in diabetes 2013 (Position Statement). Diabetes Care 2013; 36 (suppl 1): S11-66.
- Buse JB, Caprio S, Cefalu WT et al. How do we define cure of diabetes? Diabetes Care 2009;32:2133-5.
- Dixon JB, Zimmet P, Alberti KG, Rubino F. Bariatric surgery: an IDF statement for obese type 2 diabetes. Diabet Med 2011; 28: 628–42.
- Lecube A, Burguera B, Rubio MA; Grupo de Trabajo de Obesidad de la Sociedad Española de Endocrinología y Nutrición (GOSEEN). Breaking therapeutic inertia: should metabolic surgery be considered one more option for the treatment of type 2 diabetes mellitus? Endocrinol Nutr 2012;59:281-3.
